# Supplementary material for: New Crambescidin-Type Alkaloids from the Indonesian Marine Sponge Clathria bulbotoxa
Source: PubMed Central journal article supplement (PMC5867628; doi:10.3390/md16030084), 2018-03-08
Supplement: marinedrugs-16-00084-s001.pdf [file marinedrugs-16-00084-s001.pdf]

## Supplementary Materials

# New Crambescidin-type Alkaloids from the Indonesian Marine Sponge *Clathria bulbotoxa*

Kasmiati Kasmiati<sup>1,2</sup>, Yukio Yoshioka<sup>3</sup>, Tetsuji Okamoto<sup>3</sup>, and Makoto Ojika<sup>1,\*</sup>

## Contents

Table S1: NMR data of **2** (600 MHz, acetone-*d*<sub>6</sub>)  
Figure S1: <sup>1</sup>H NMR spectrum of **1** (600 MHz, CD<sub>3</sub>OD)  
Figure S2: <sup>1</sup>H NMR spectrum of **1** (400 MHz, CDCl<sub>3</sub>)  
Figure S3: <sup>13</sup>C NMR spectrum of **1** (150 MHz, CD<sub>3</sub>OD)  
Figure S4: DQF-COSY spectrum of **1** (600 MHz, CD<sub>3</sub>OD)  
Figure S5: HSQC spectrum of **1** (600 MHz, CD<sub>3</sub>OD)  
Figure S6: HMBC spectrum of **1** (600 MHz, CD<sub>3</sub>OD)  
Figure S7: NOESY spectrum of **1** (600 MHz, CD<sub>3</sub>OD)  
Figure S8: IR spectrum of **1**  
Figure S9: ESI-TOF-MS(+) spectra of **1–3**  
Figure S10: <sup>1</sup>H NMR spectrum of **2** (400 MHz, CD<sub>3</sub>OD)  
Figure S11: <sup>13</sup>C NMR spectrum of **2** (100 MHz, CD<sub>3</sub>OD)  
Figure S12: DQF-COSY spectrum of **2** (400 MHz, CD<sub>3</sub>OD)  
Figure S13: HSQC spectrum of **2** (400 MHz, CD<sub>3</sub>OD)  
Figure S14: HMBC spectrum of **2** (400 MHz, CD<sub>3</sub>OD)  
Figure S15: NOESY spectrum of **2** (400 MHz, CD<sub>3</sub>OD)  
Figure S16: IR spectrum of **2**  
Figure S17: <sup>1</sup>H NMR spectrum of **2** (600 MHz, acetone-*d*<sub>6</sub>)  
Figure S18: <sup>13</sup>C NMR spectrum of **2** (150 MHz, acetone-*d*<sub>6</sub>)  
Figure S19: DQF-COSY spectrum of **2** (600 MHz, acetone-*d*<sub>6</sub>)  
Figure S20: HSQC spectrum of **2** (600 MHz, acetone-*d*<sub>6</sub>)  
Figure S21: HMBC spectrum of **2** (600 MHz, acetone-*d*<sub>6</sub>)  
Figure S22: NOESY spectrum of **2** (600 MHz, acetone-*d*<sub>6</sub>)  
Figure S23: <sup>1</sup>H NMR spectrum of **3** (600 MHz, CD<sub>3</sub>OD)  
Figure S24: <sup>1</sup>H NMR spectrum of **3** (400 MHz, CDCl<sub>3</sub>)  
Figure S25: <sup>13</sup>C NMR spectrum of **3** (150 MHz, CD<sub>3</sub>OD)  
Figure S26: DQF-COSY spectrum of **3** (600 MHz, CD<sub>3</sub>OD)  
Figure S27: HSQC spectrum of **3** (600 MHz, CD<sub>3</sub>OD)  
Figure S28: HMBC spectrum of **3** (600 MHz, CD<sub>3</sub>OD)  
Figure S29: IR spectrum of **3**  
Figure S30: <sup>1</sup>H NMR spectrum of **4** (400 MHz, CD<sub>3</sub>OD)  
Figure S31: <sup>1</sup>H NMR spectrum of **5** (400 MHz, CD<sub>3</sub>OD)  
Figure S32: <sup>1</sup>H NMR spectrum of **6** (400 MHz, CD<sub>3</sub>OD)  
Figure S33: Anti-oomycete activity of compounds **1–6**

Table S1: NMR data of **2** (600 MHz, acetone-*d*<sub>6</sub>)

| Position | $\delta_C$ (ppm)                   | $\delta_H$ (ppm), m, J (Hz) |
|----------|------------------------------------|-----------------------------|
| 1        | 13.7, CH <sub>3</sub>              | 0.85, t (7.2)               |
| 2        | 19.1, CH <sub>2</sub>              | 1.34, m                     |
| 3        | 38.4, CH <sub>2</sub>              | 1.37, m                     |
| 4        | 69.9, CH                           | 3.70, t (9.9)               |
| 5a       | 31.6, CH <sub>2</sub>              | 1.19, m                     |
| 5b       |                                    | 1.59, m                     |
| 6a       | 18.9, CH <sub>2</sub> <sup>a</sup> | 1.62, m                     |
| 6b       |                                    | 2.29, m                     |
| 7a       | 34.4, CH <sub>2</sub> <sup>b</sup> | 1.62, m                     |
| 7b       |                                    | 1.74, m                     |
| 8        | 81.0, C <sup>c</sup>               |                             |
| 9a       | 40.3, CH <sub>2</sub> <sup>d</sup> | 1.62, m                     |
| 9b       |                                    | 2.16, t (12.9) <sup>g</sup> |
| 10       | 53.2, CH <sup>e</sup>              | 4.00, m                     |
| 11a      | 30.5, CH <sub>2</sub> <sup>f</sup> | 1.78, m                     |
| 11b      |                                    | 2.31, m                     |
| 12a      | 30.4, CH <sub>2</sub> <sup>f</sup> | 1.78, m                     |
| 12b      |                                    | 2.31, m                     |
| 13       | 52.7, CH <sup>e</sup>              | 4.00, m                     |
| 14a      | 40.4, CH <sub>2</sub> <sup>d</sup> | 1.62, m                     |
| 14b      |                                    | 2.15, t (12.9) <sup>g</sup> |
| 15       | 81.1, C <sup>c</sup>               |                             |
| 16a      | 34.3, CH <sub>2</sub> <sup>b</sup> | 1.62, m                     |
| 16b      |                                    | 1.74, m                     |
| 17a      | 18.7, CH <sub>2</sub> <sup>a</sup> | 1.62, m                     |
| 17b      |                                    | 2.29, m                     |
| 18a      | 33.1, CH <sub>2</sub>              | 1.16, m                     |
| 18b      |                                    | 1.64, m                     |
| 19       | 67.1, CH                           | 3.80, m                     |
| 20       | 22.1, CH <sub>3</sub>              | 1.06, d (6.0)               |
| 21       | 149.4, C                           |                             |
| NHa      |                                    | 10.13, s                    |
| NHb      |                                    | 10.16, s                    |

The number of hydrogen on carbon was determined by HSQC. <sup>a-g</sup> Interchangeable signals within the same marks.

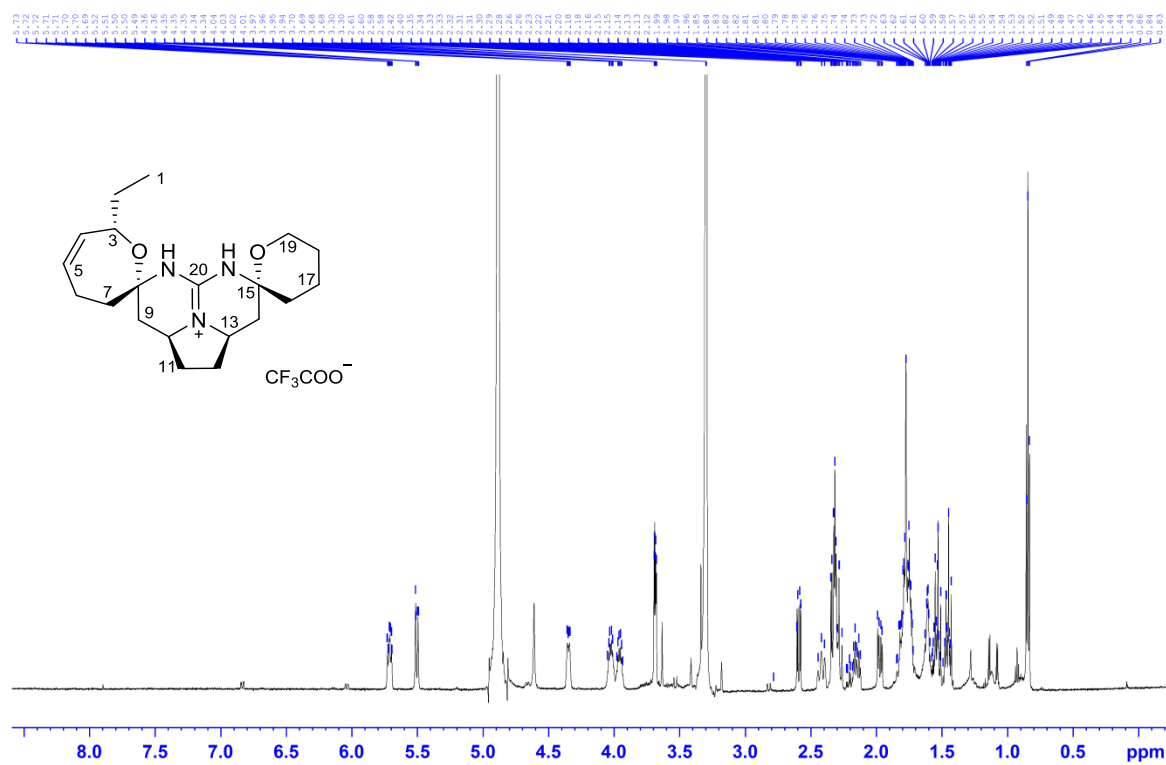Figure S1:  $^1\text{H}$  NMR spectrum of **1** (600 MHz,  $\text{CD}_3\text{OD}$ ).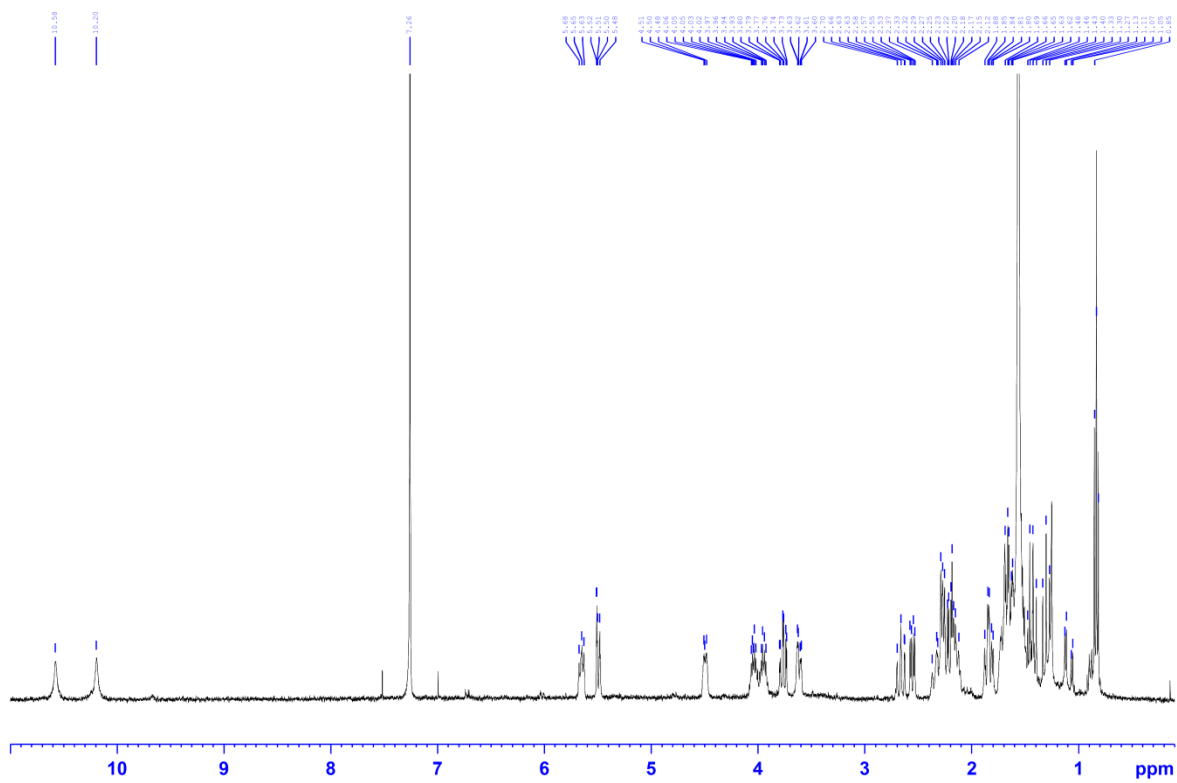Figure S2:  $^1\text{H}$  NMR spectrum of **1** (400 MHz,  $\text{CDCl}_3$ ).

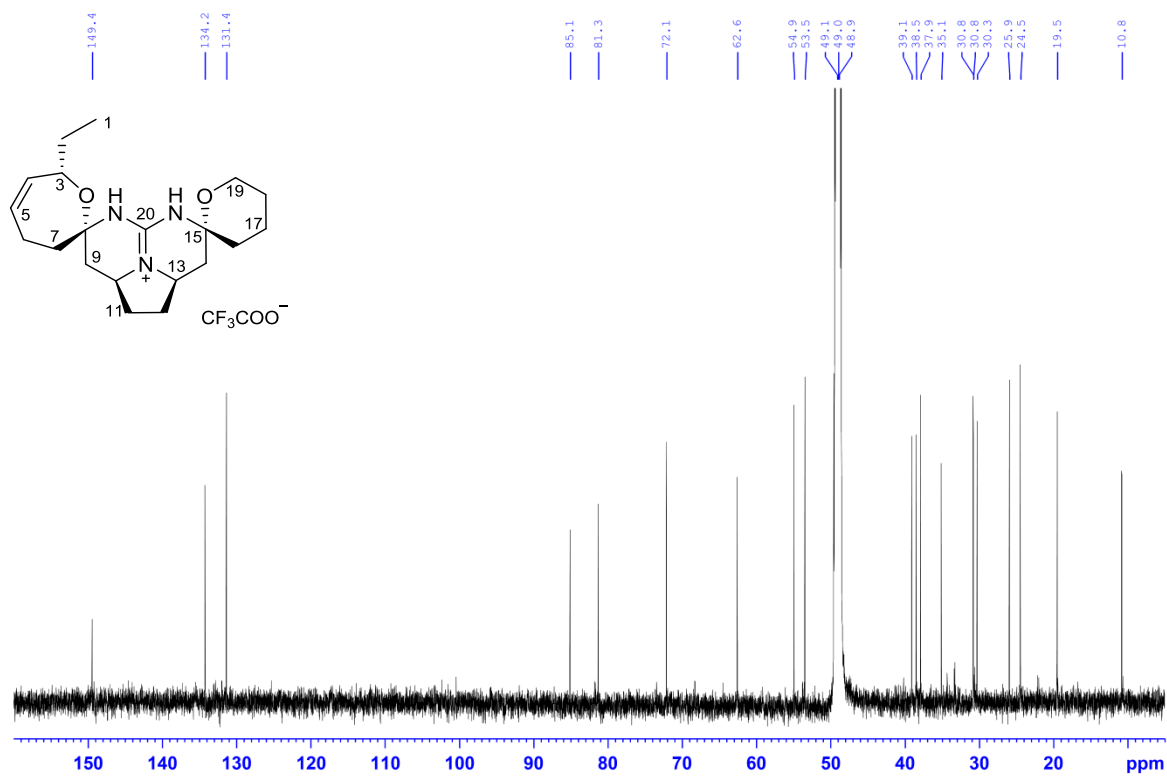Figure S3:  $^{13}\text{C}$  NMR spectrum of 1 (150 MHz,  $\text{CD}_3\text{OD}$ ).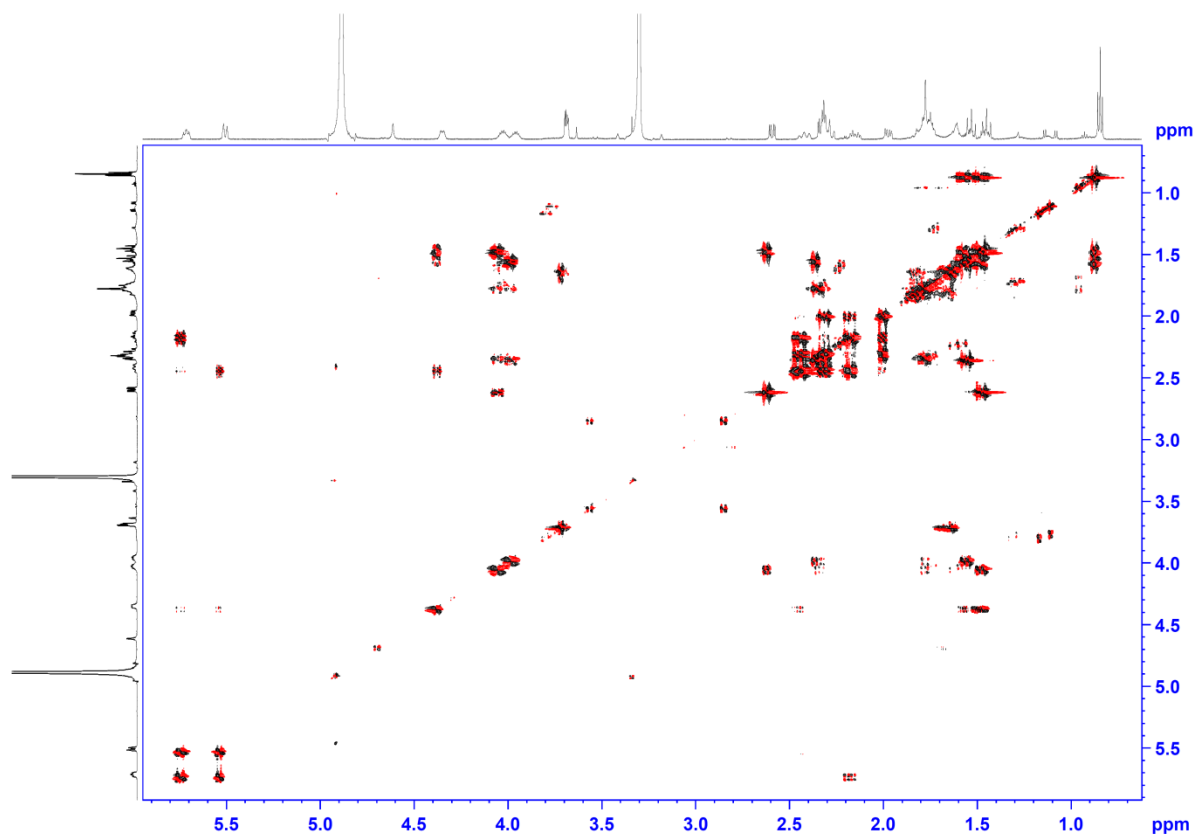Figure S4: DQF-COSY spectrum of 1 (600 MHz,  $\text{CD}_3\text{OD}$ ).

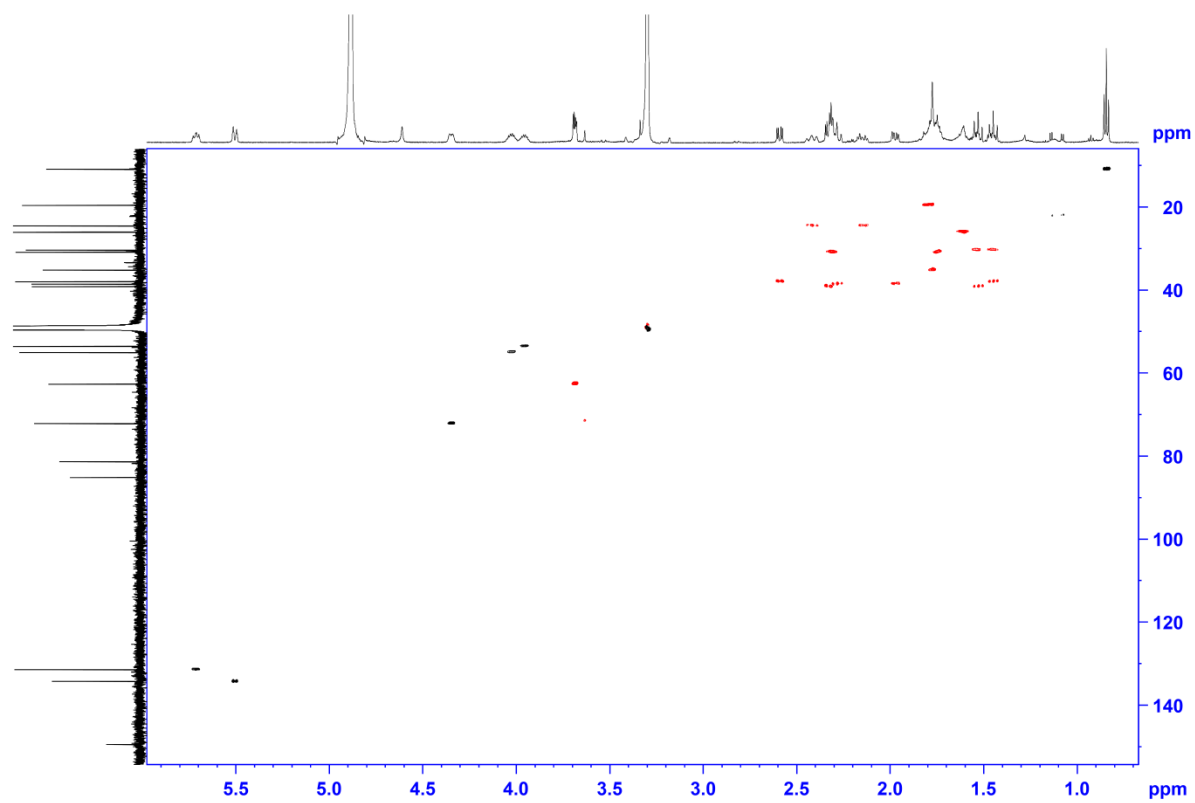

Figure S5: HSQC spectrum of **1** (600 MHz, CD<sub>3</sub>OD).

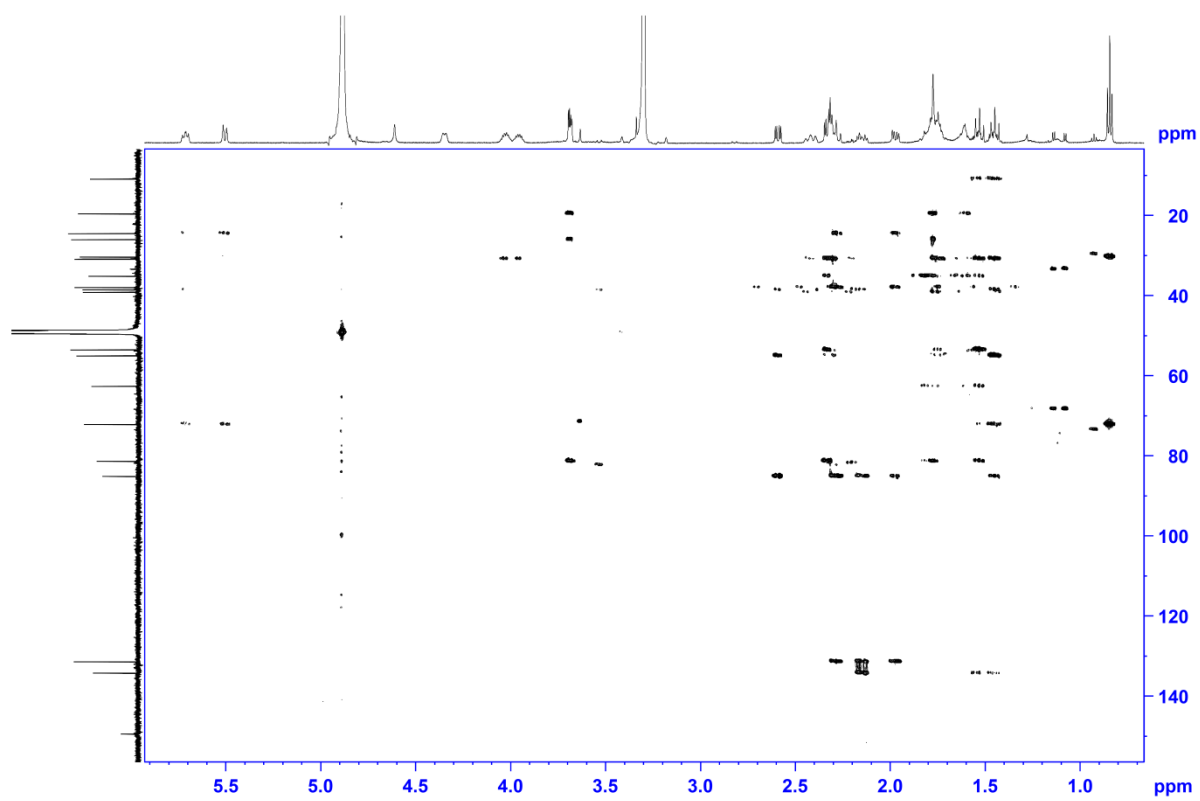

Figure S6: HMBC spectrum of **1** (600 MHz, CD<sub>3</sub>OD).

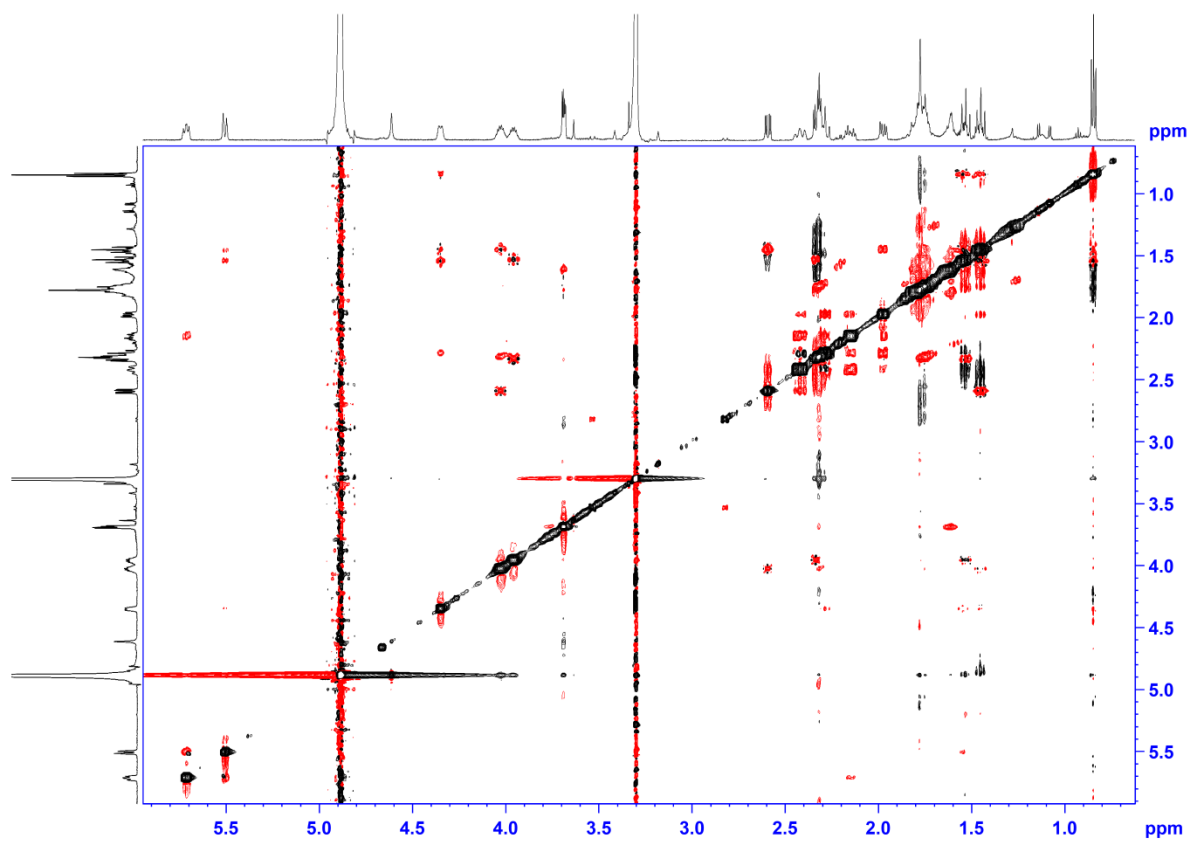

Figure S7: NOESY spectrum 1 (600 MHz, CD<sub>3</sub>OD).

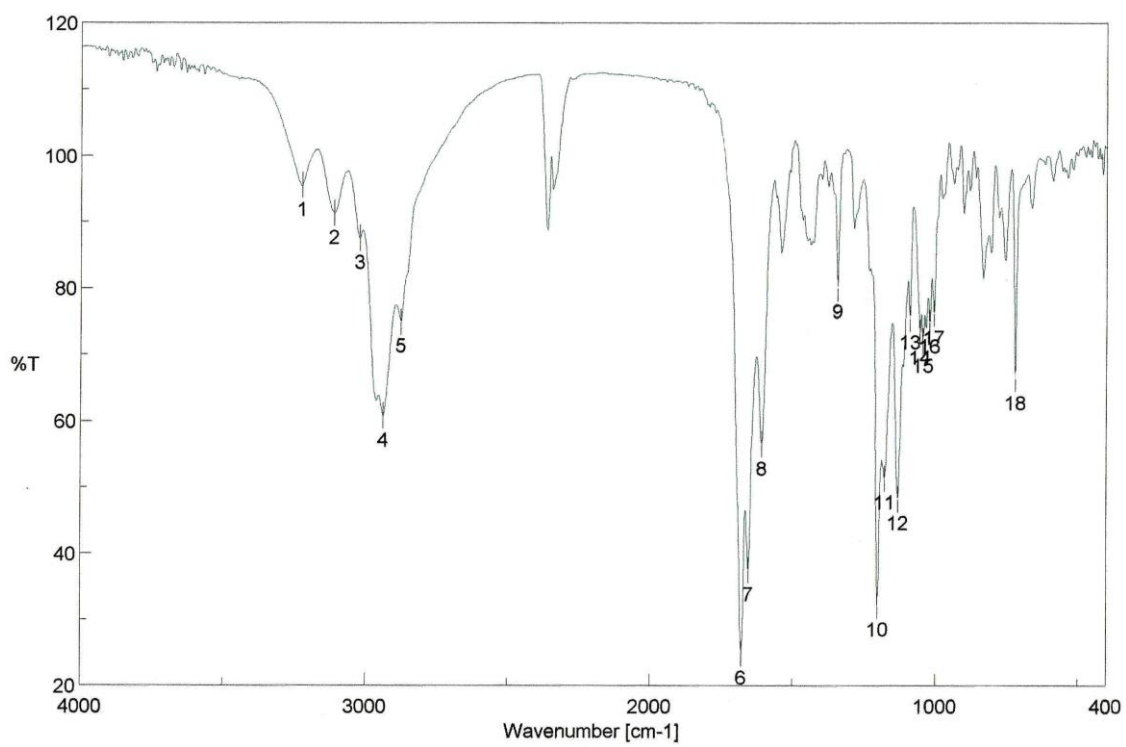

Figure S8: IR spectrum of 1.

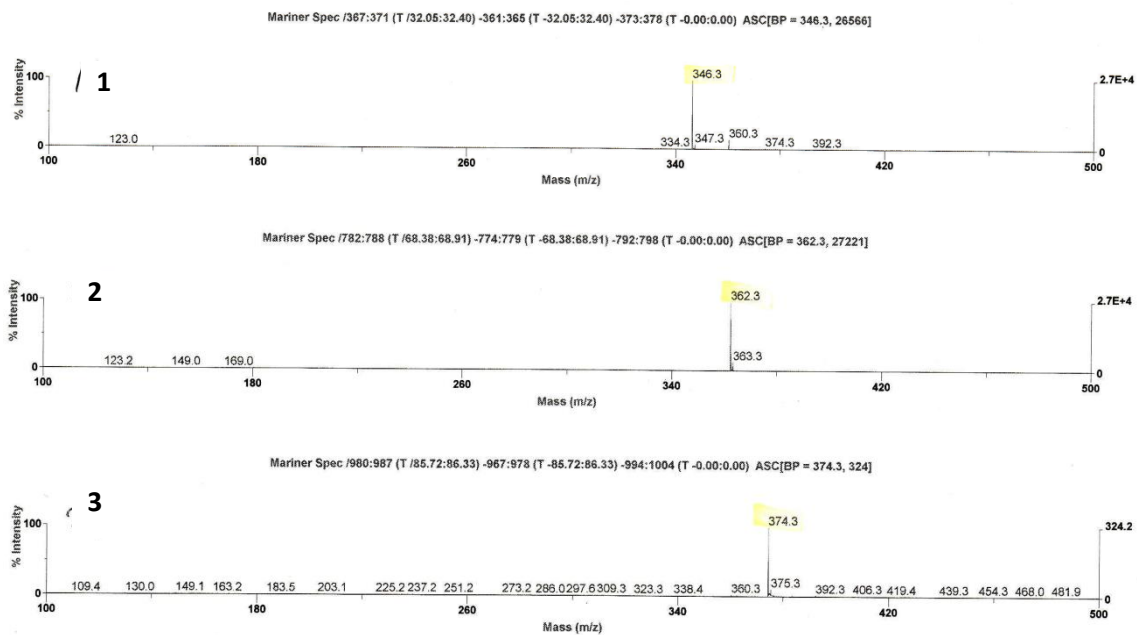

Figure S9: ESI-TOF-MS(+) spectra of 1–3.

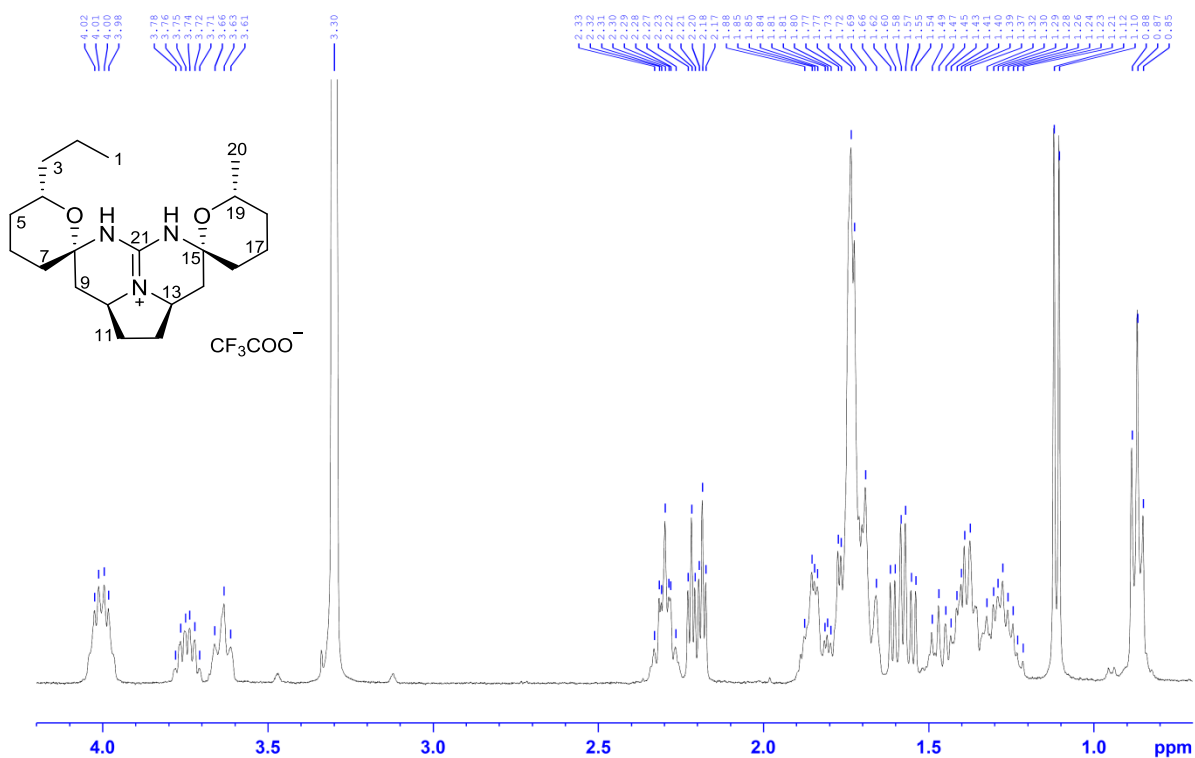Figure S10: <sup>1</sup>H NMR spectrum of 2 (400 MHz, CD<sub>3</sub>OD).

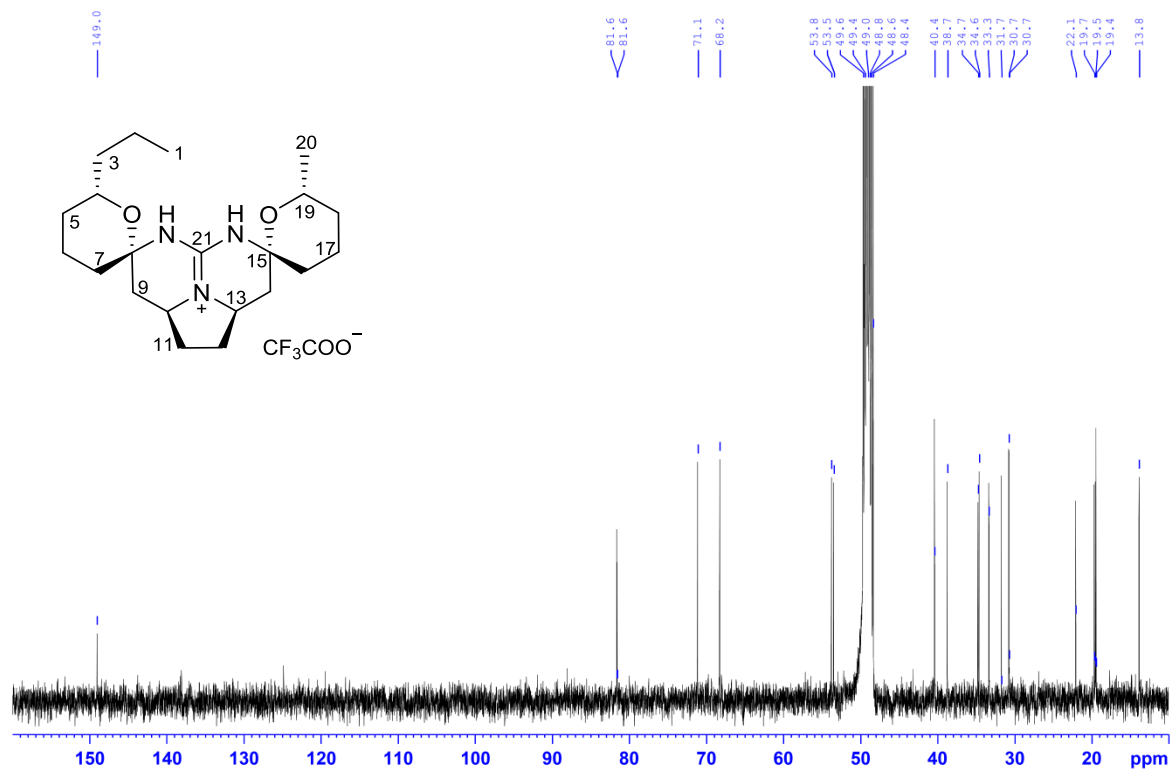Figure S11:  $^{13}\text{C}$  NMR spectrum of 2 (100 MHz,  $\text{CD}_3\text{OD}$ ).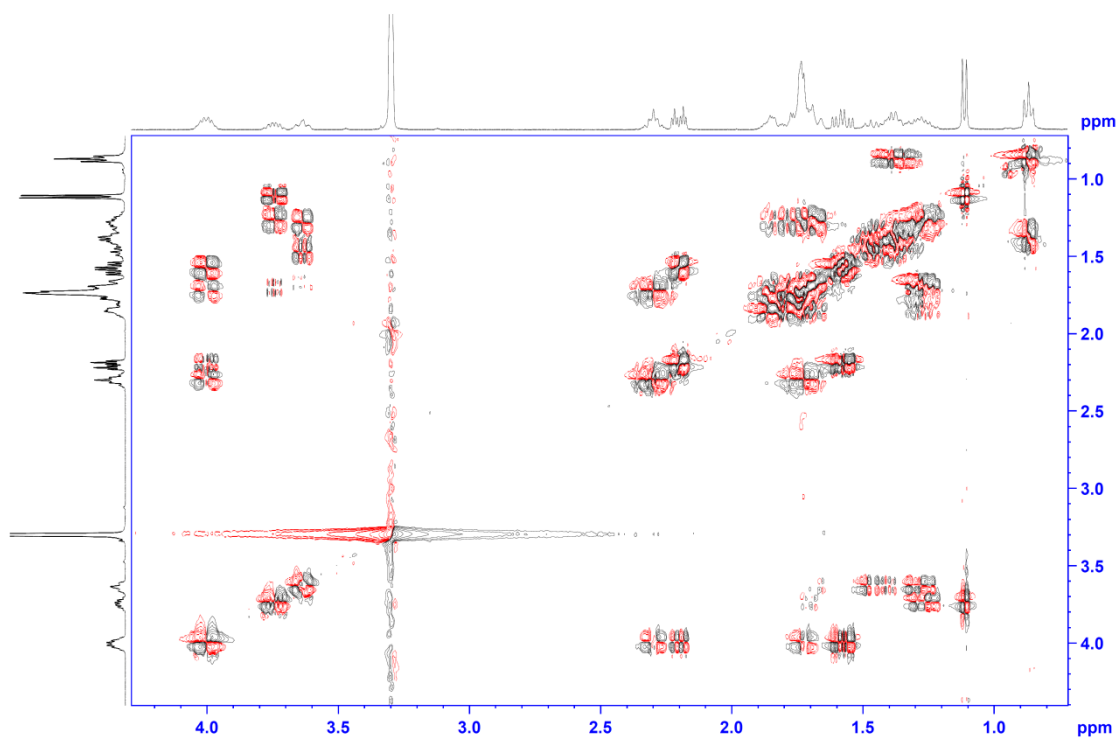Figure S12: DQF-COSY spectrum of 2 (400 MHz,  $\text{CD}_3\text{OD}$ ).



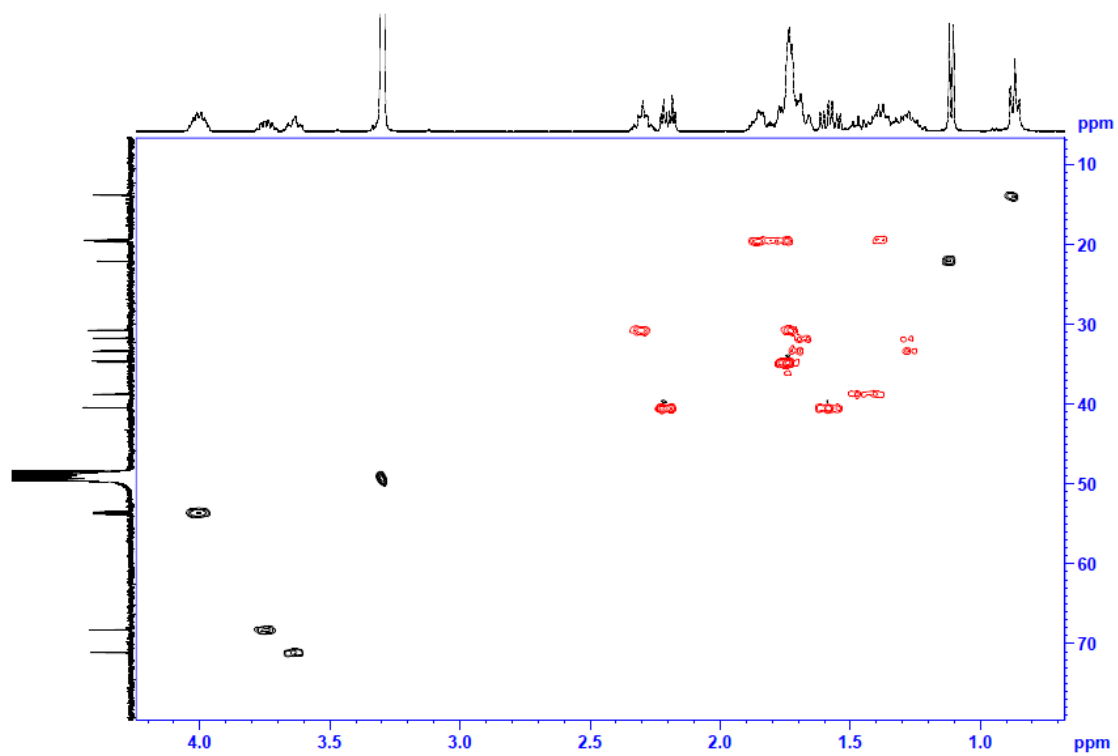

Figure S13: HSQC spectrum of **2** (400 MHz, CD<sub>3</sub>OD).

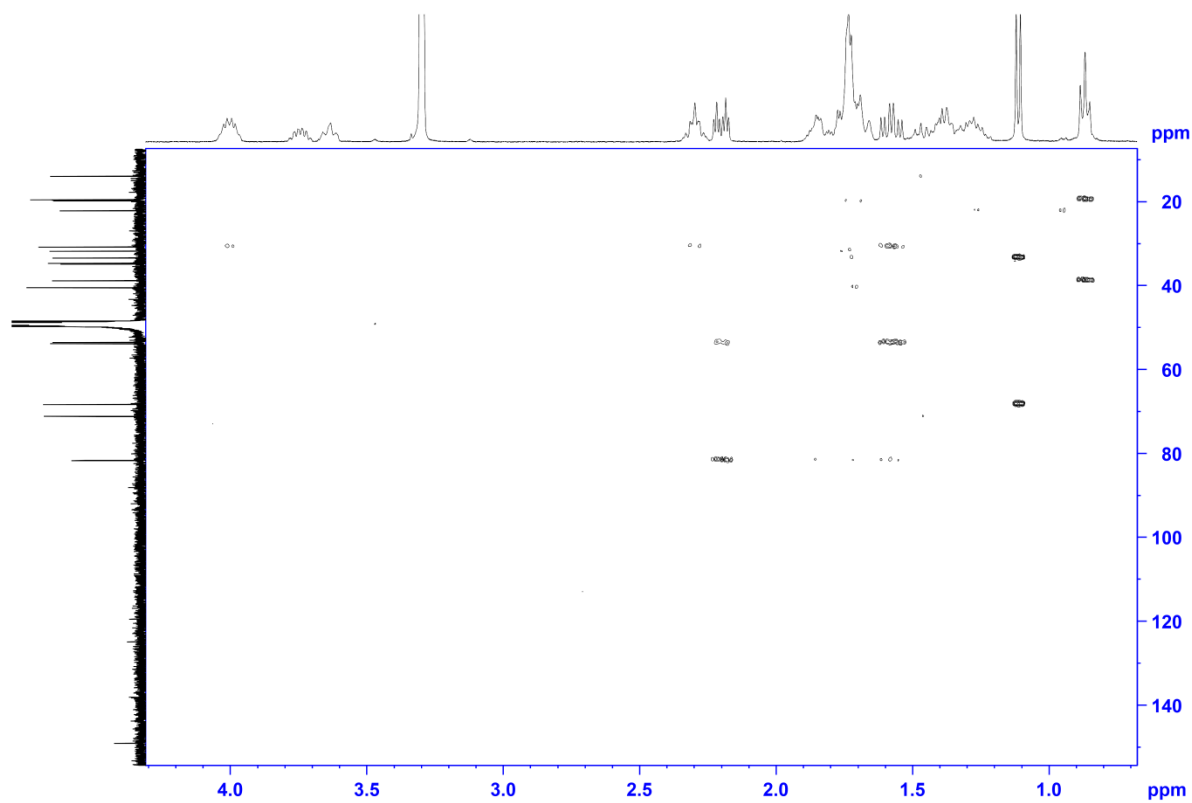

Figure S14: HMBC spectrum of **2** (400 MHz, CD<sub>3</sub>OD).

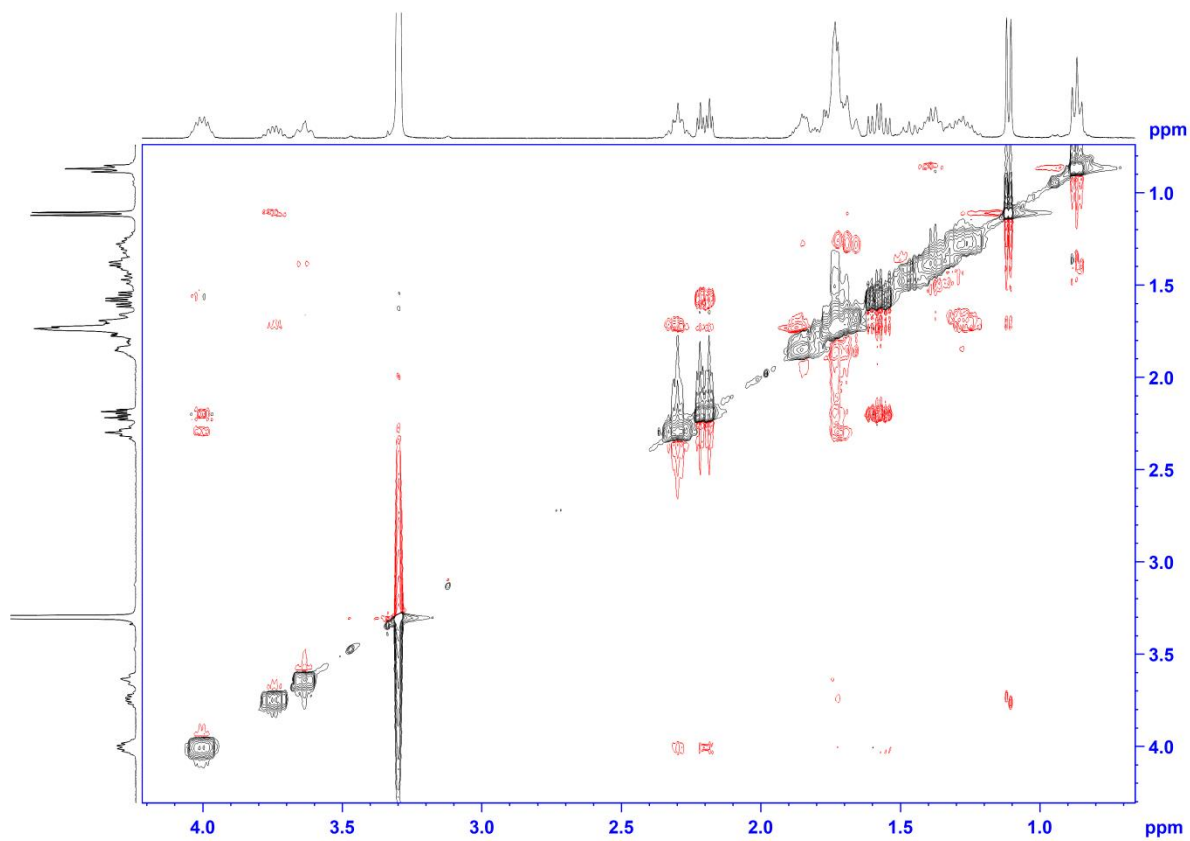Figure S15: NOESY spectrum of 2 (400 MHz, CD<sub>3</sub>OD).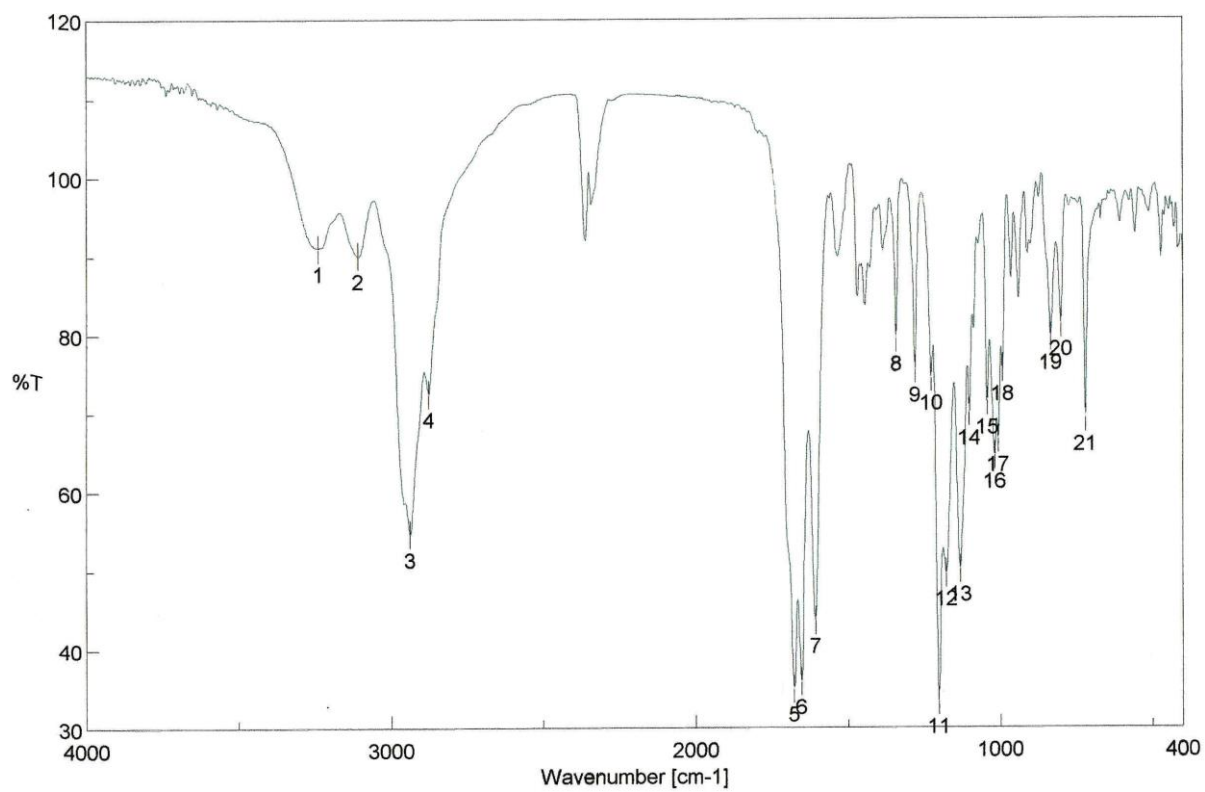

Figure S16: IR spectrum of 2.

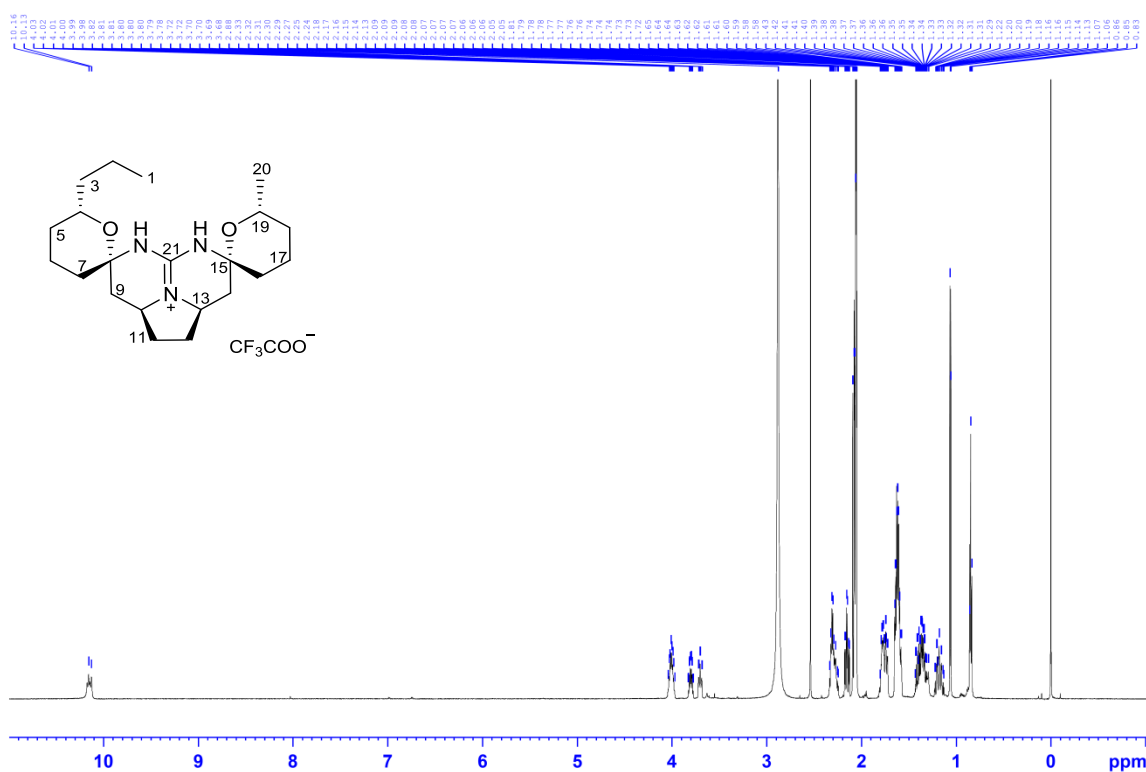Figure S17:  $^1\text{H}$  NMR spectrum of **2** (600 MHz, acetone- $d_6$ ).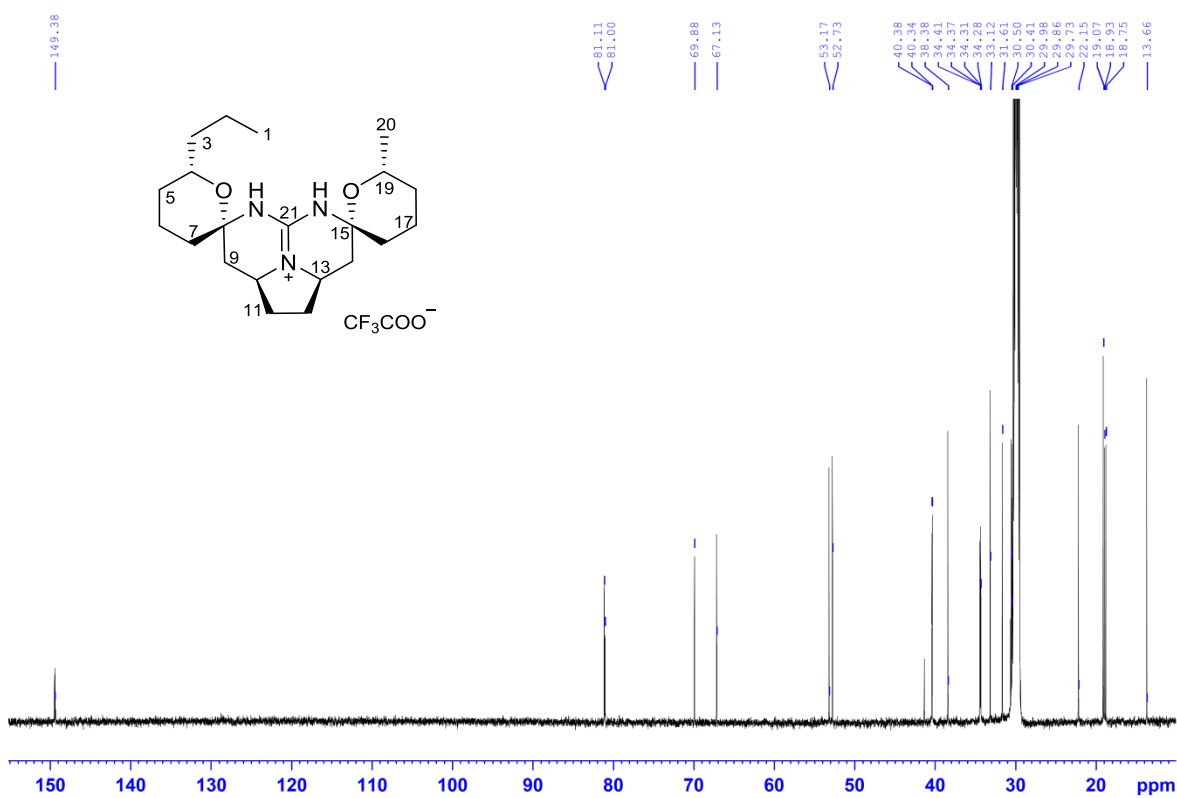Figure S18:  $^{13}\text{C}$  NMR spectrum of **2** (150 MHz, acetone- $d_6$ ).

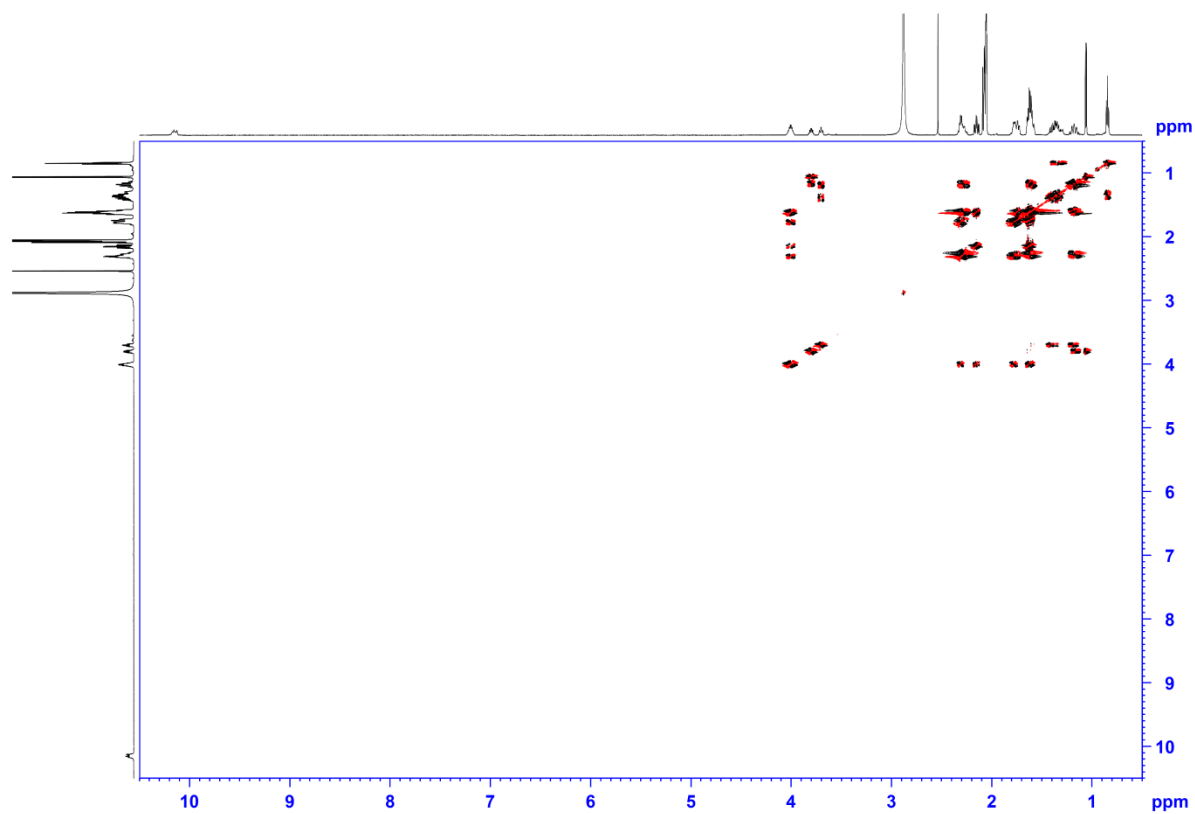

Figure S19: DQF-COSY spectrum of **2** (600 MHz, acetone-*d*<sub>6</sub>).

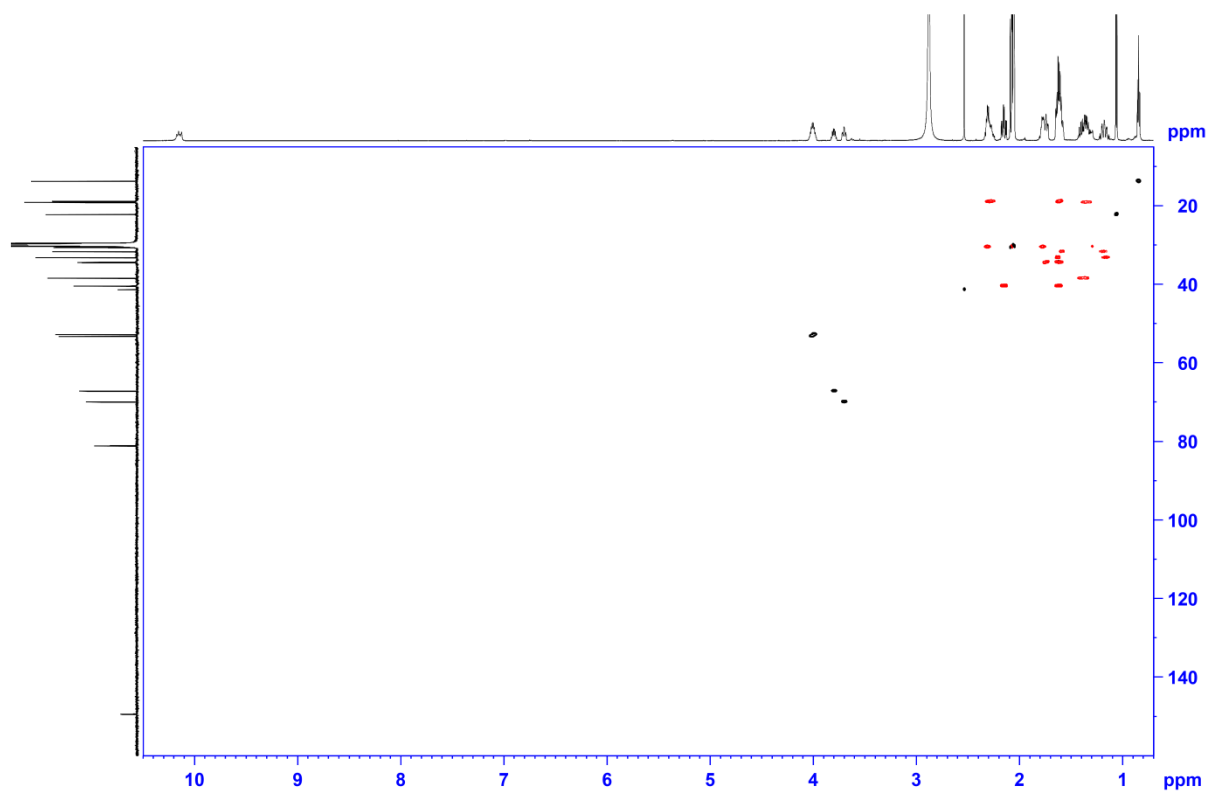

Figure S20: HSQC spectrum of **2** (600 MHz, acetone-*d*<sub>6</sub>).

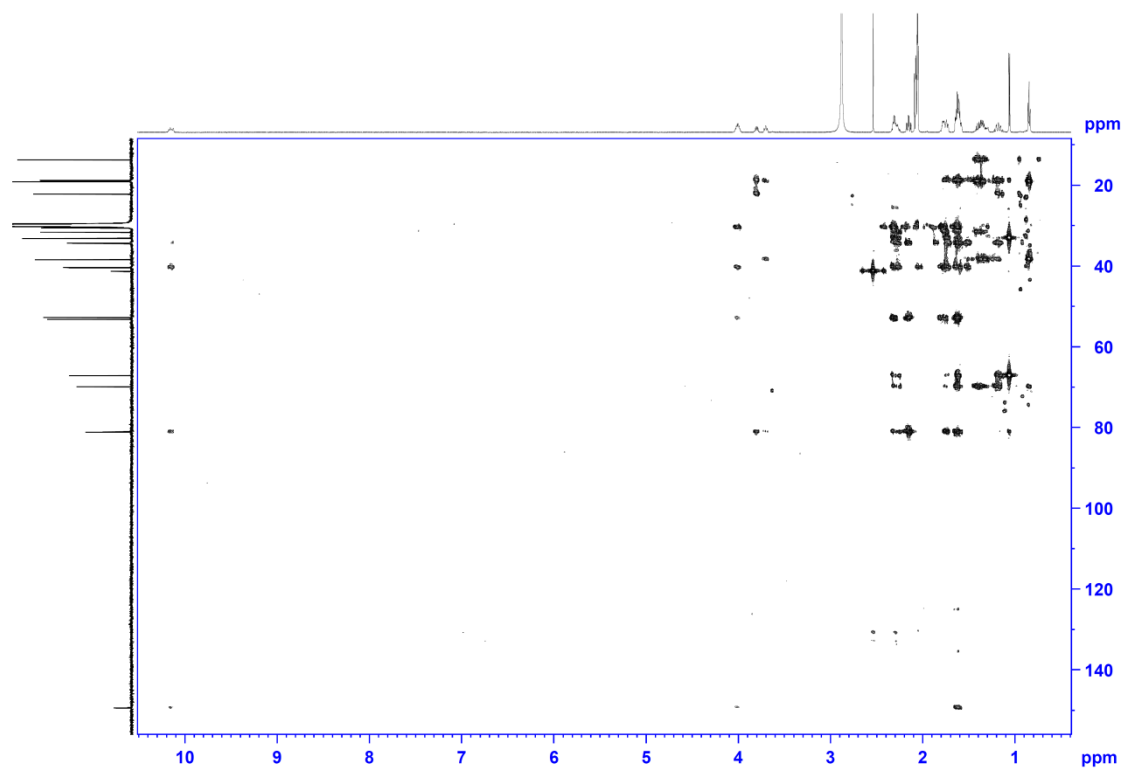

Figure S21: HMBC spectrum of **2** (600 MHz, acetone-*d*<sub>6</sub>).

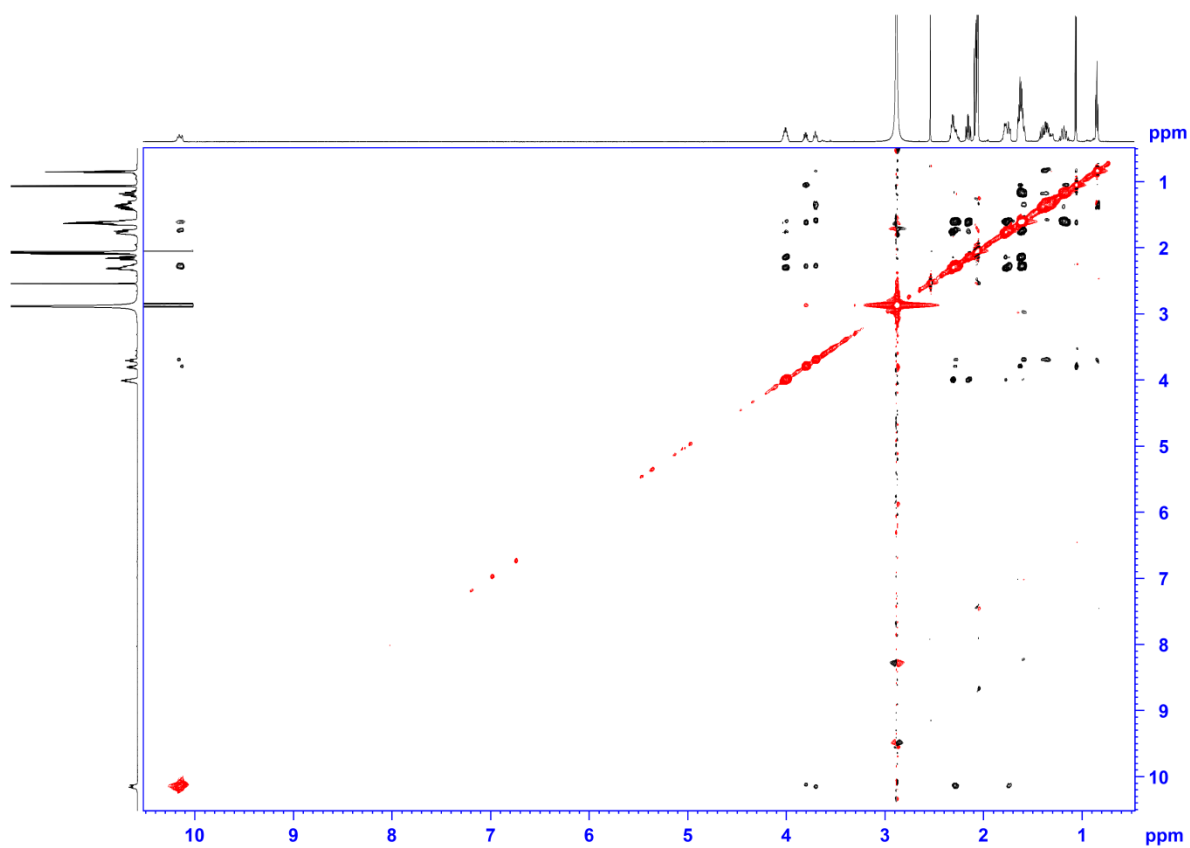

Figure S22: NOESY spectrum of **2** (600 MHz, acetone-*d*<sub>6</sub>).

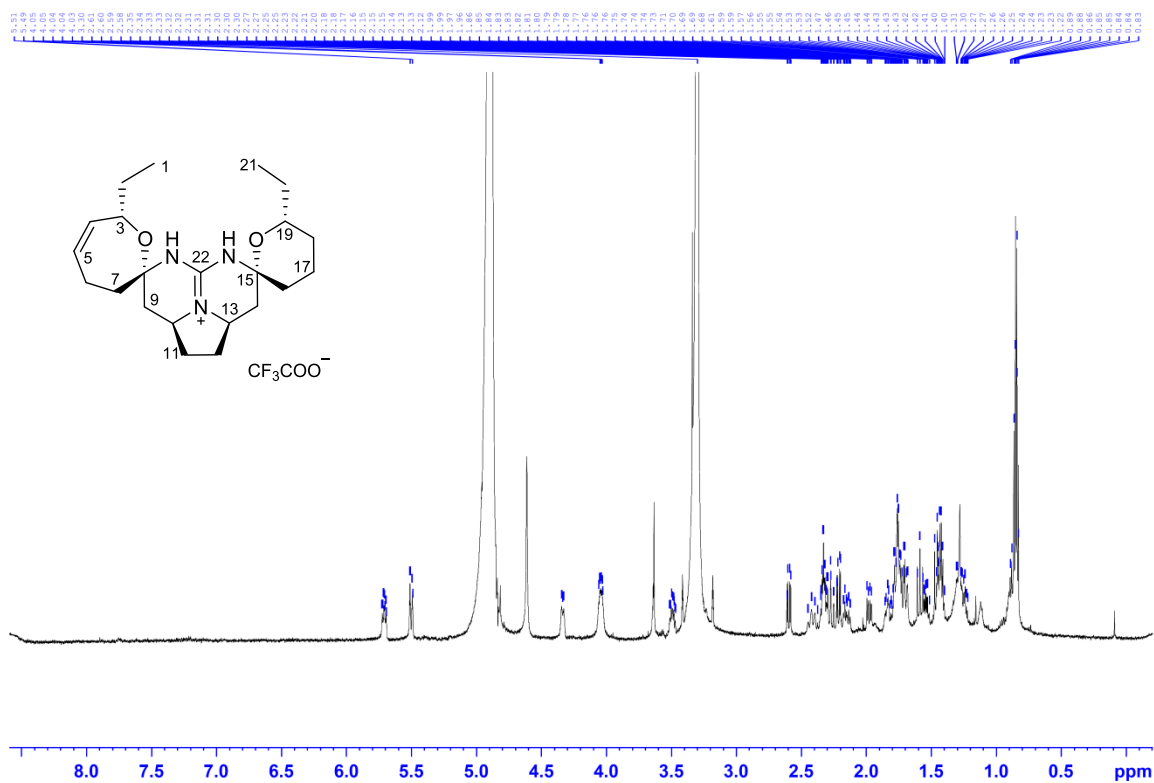Figure S23:  $^1\text{H}$  NMR spectrum of **3** (600 MHz,  $\text{CD}_3\text{OD}$ ).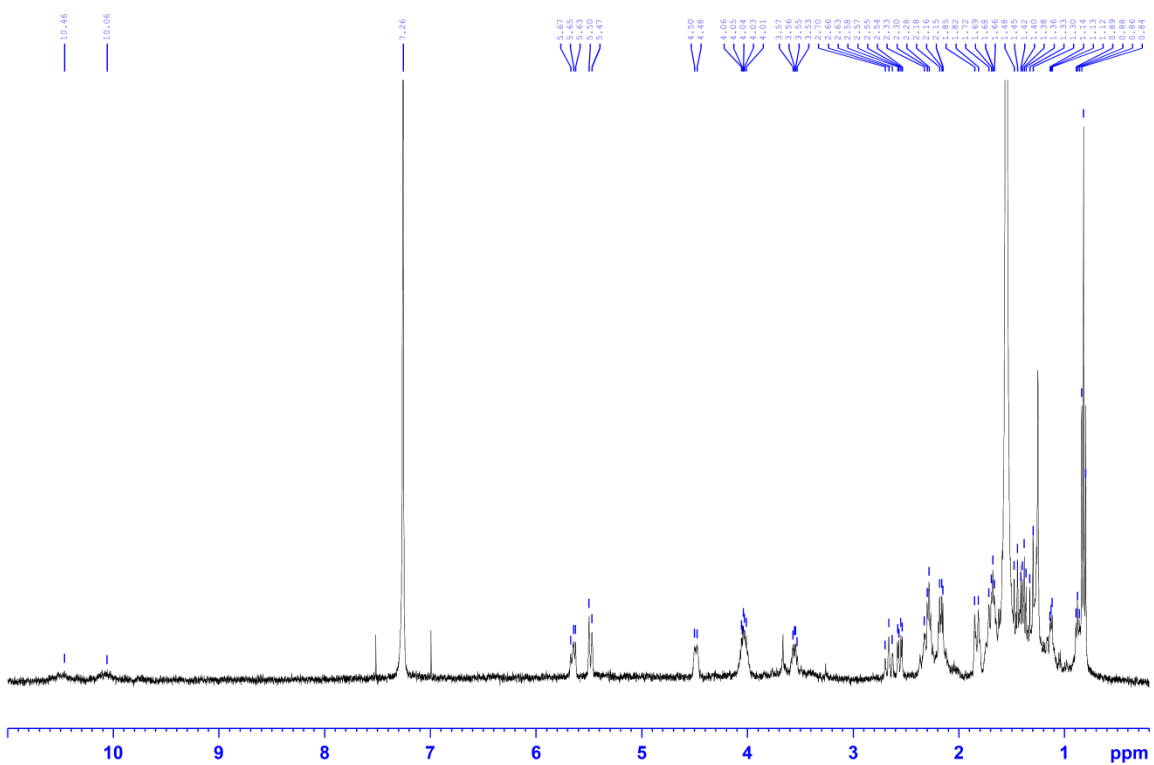Figure S24:  $^1\text{H}$  NMR spectrum of **3** (400 MHz,  $\text{CDCl}_3$ ).

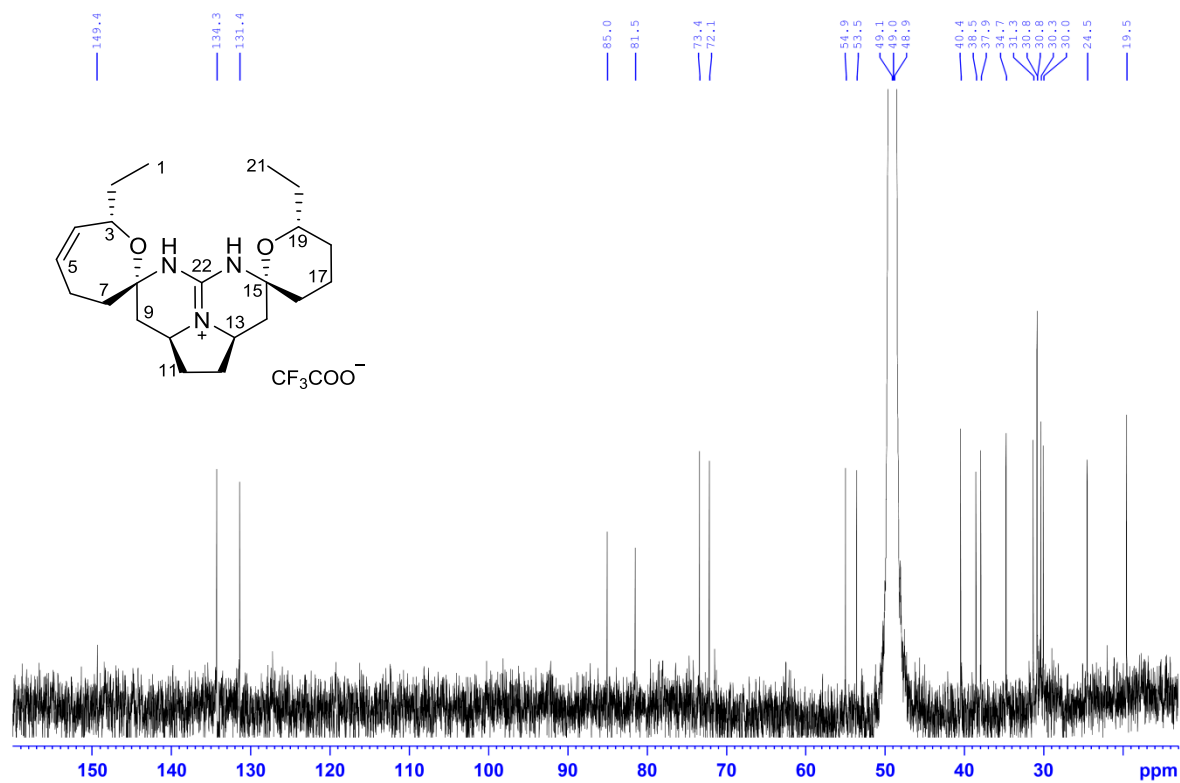Figure S25:  $^{13}\text{C}$  NMR spectrum of 3 (150 MHz,  $\text{CD}_3\text{OD}$ ).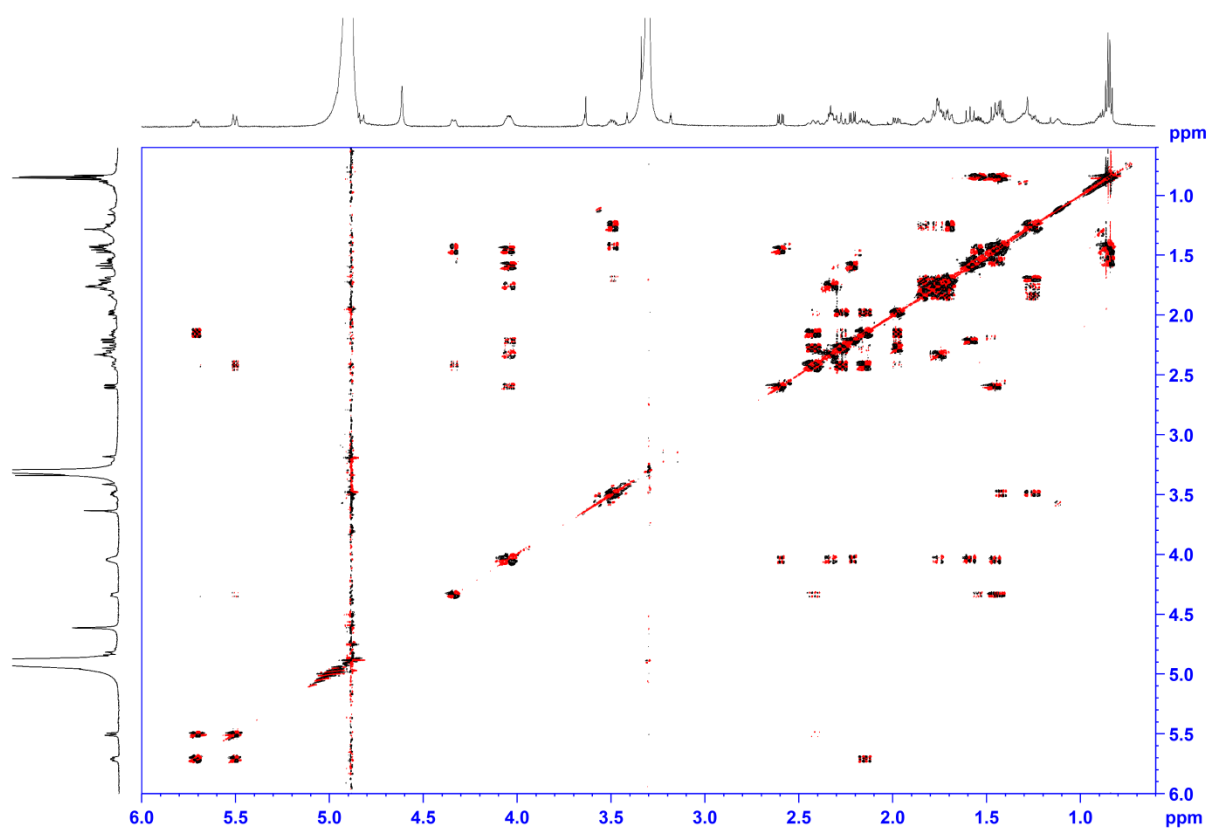Figure S26: DQF-COSY spectrum of 3 (600 MHz,  $\text{CD}_3\text{OD}$ ).

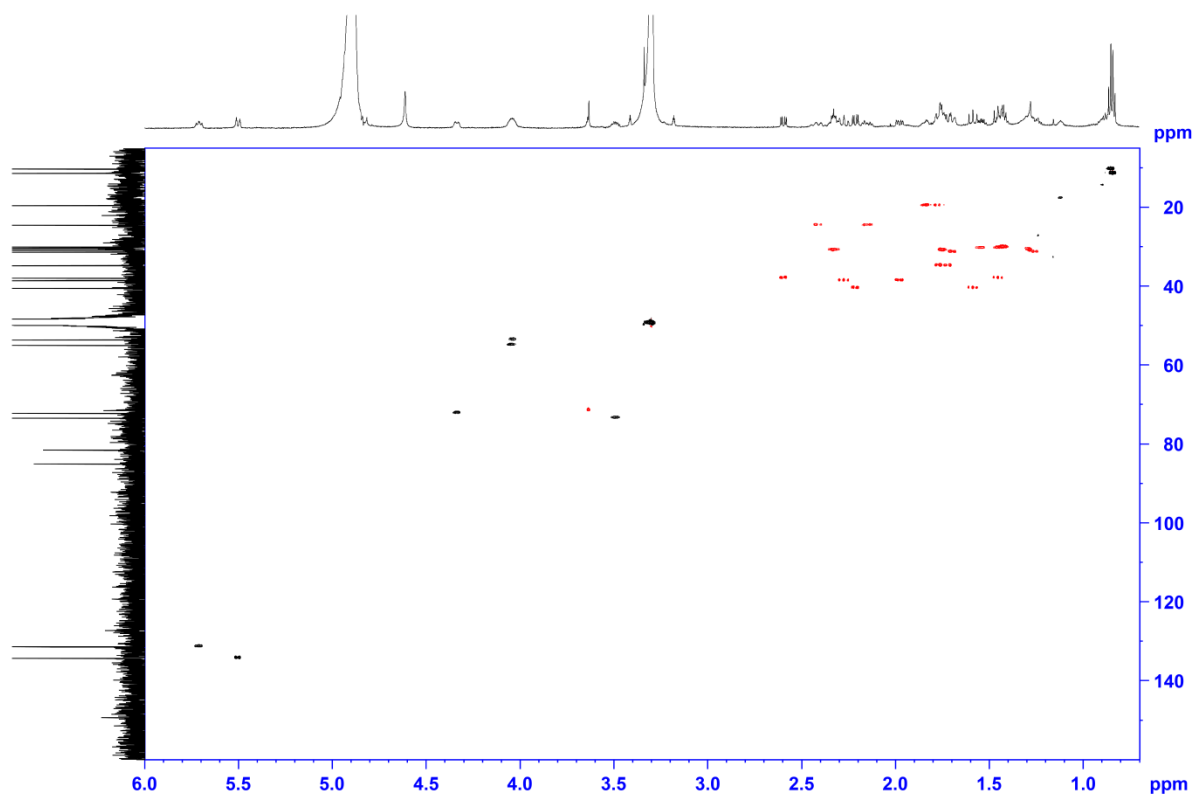Figure S27: HSQC spectrum of **3** (600 MHz, CD<sub>3</sub>OD).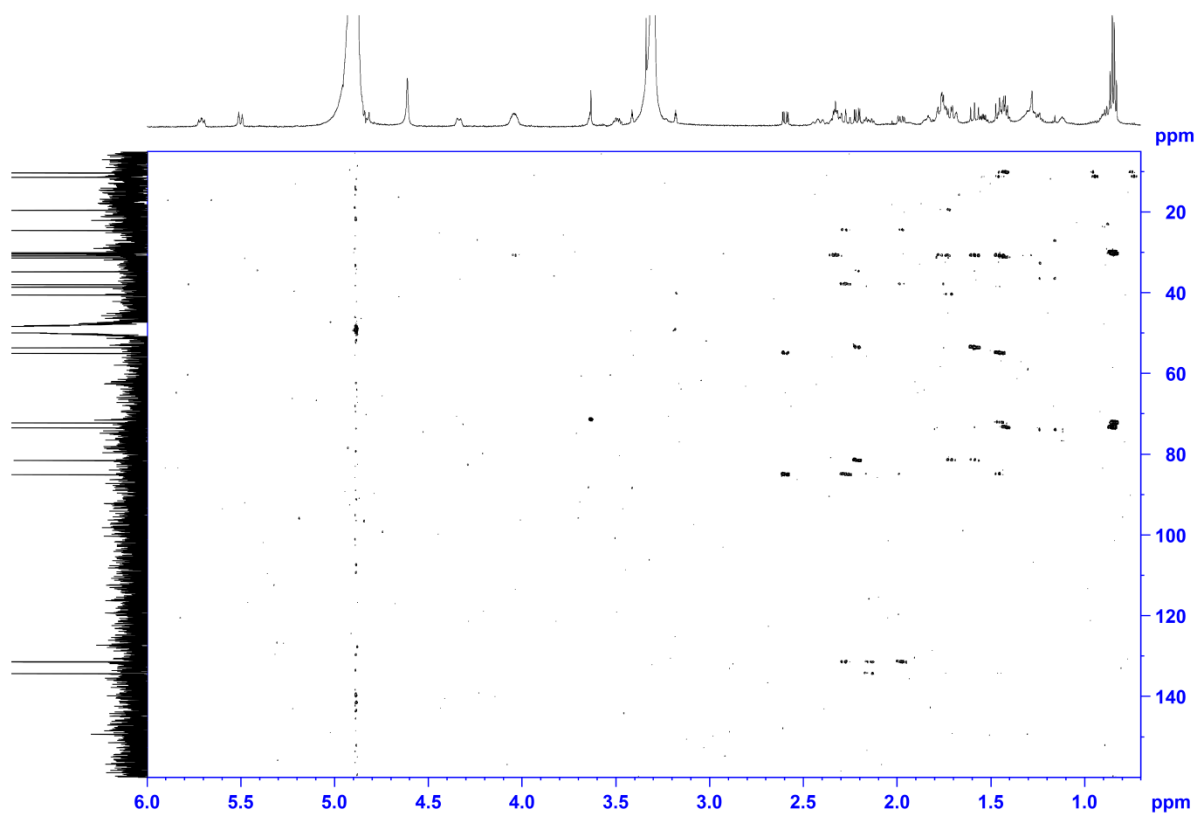Figure S28: HMBC spectrum **3** (600 MHz, CD<sub>3</sub>OD).



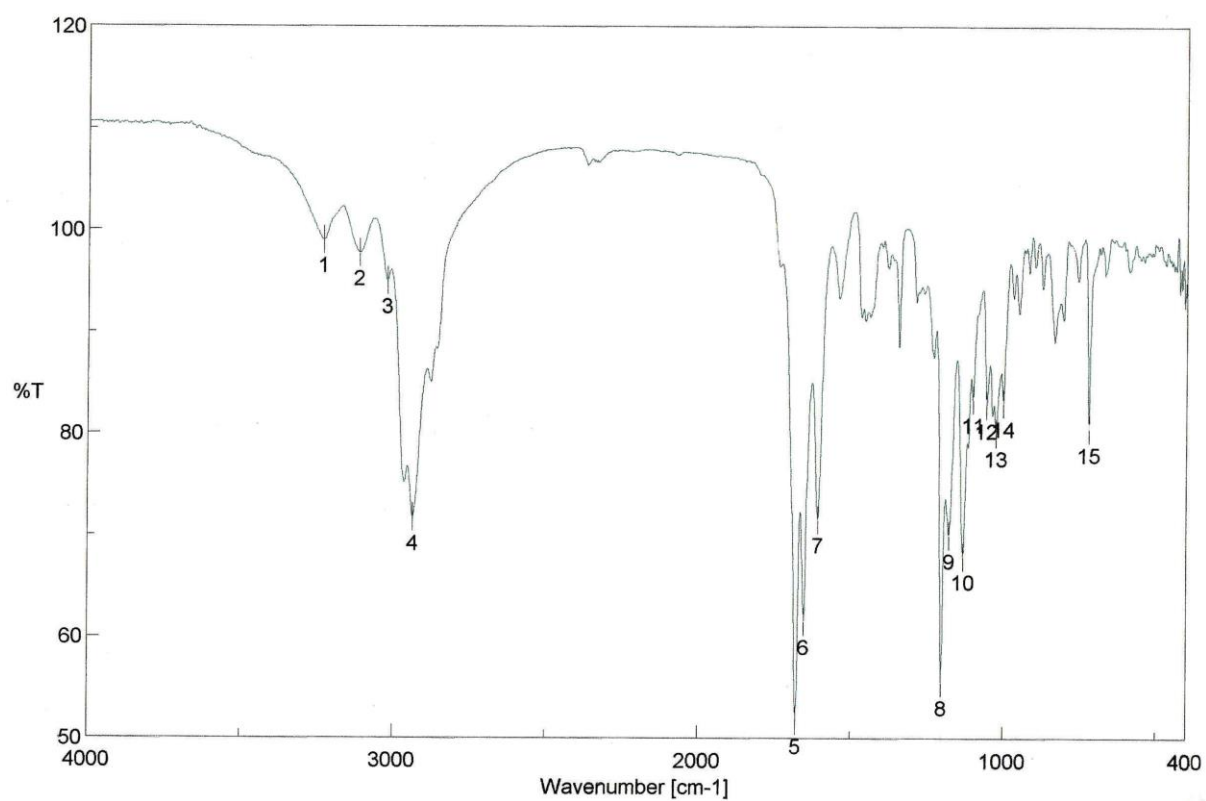

Figure S29: IR spectrum of 3.

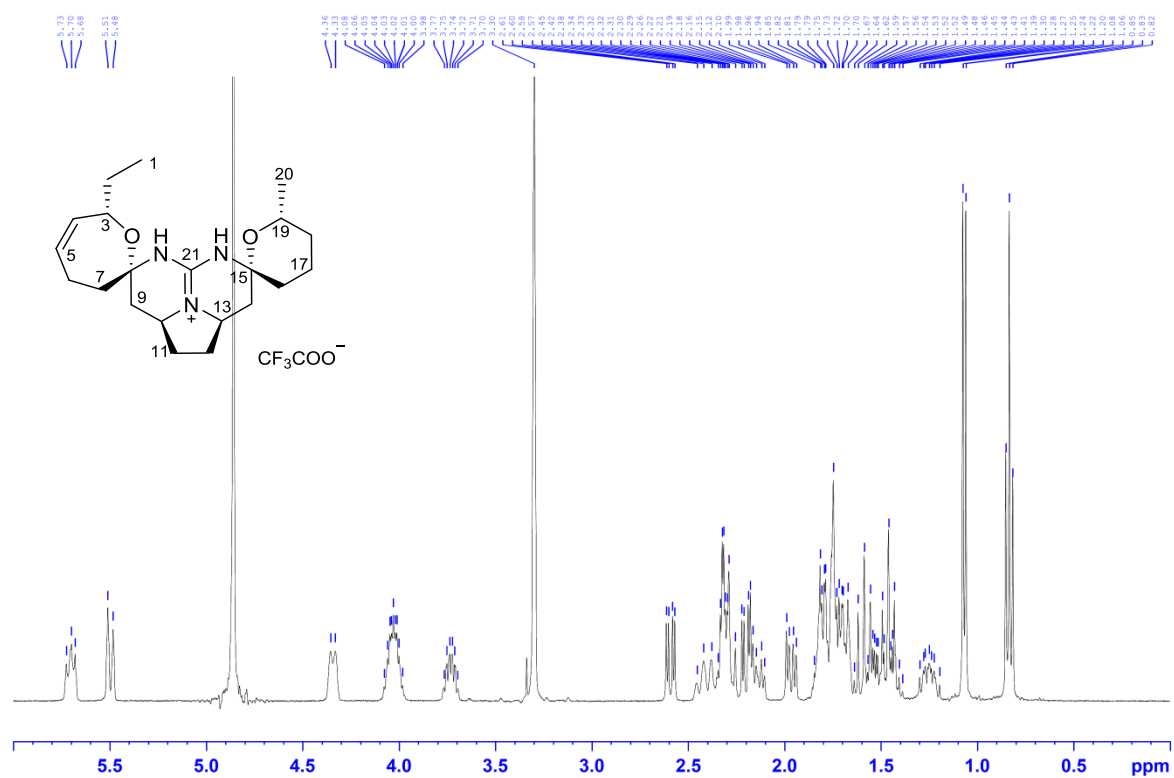Figure S30: <sup>1</sup>H NMR spectrum 4 (400 MHz, CD<sub>3</sub>OD).

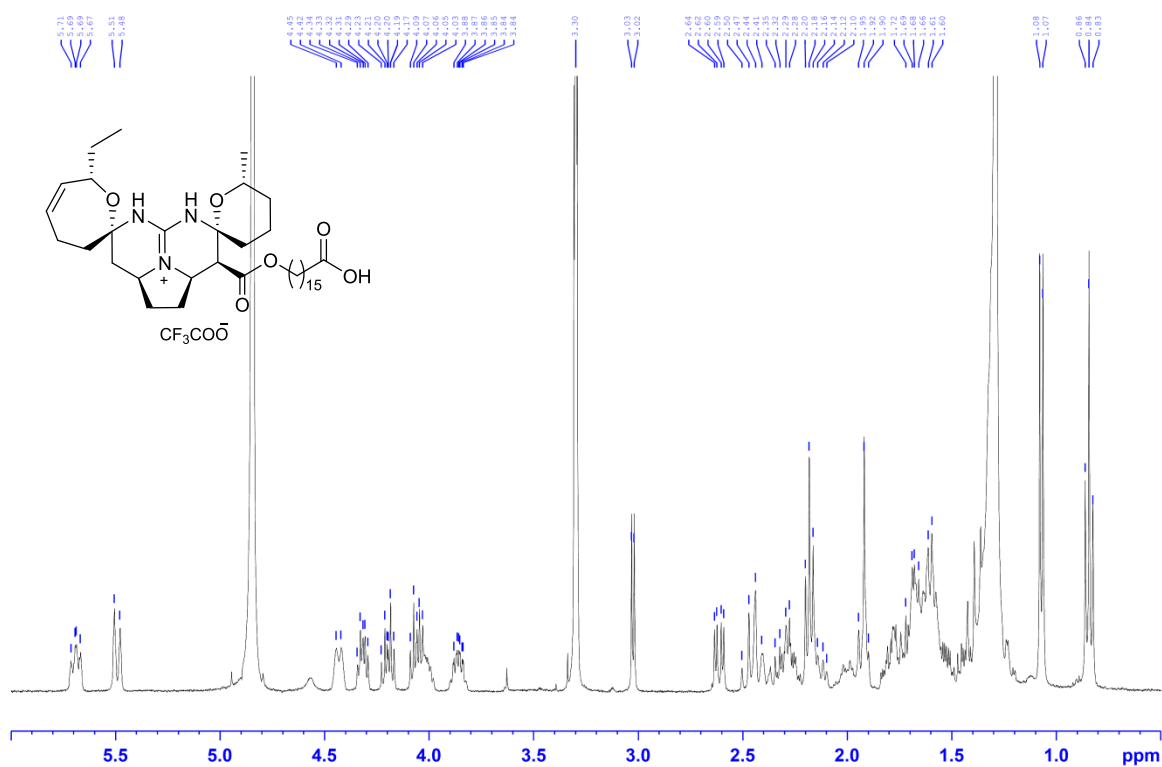Figure S31: <sup>1</sup>H NMR spectrum 5 (400 MHz, CD<sub>3</sub>OD).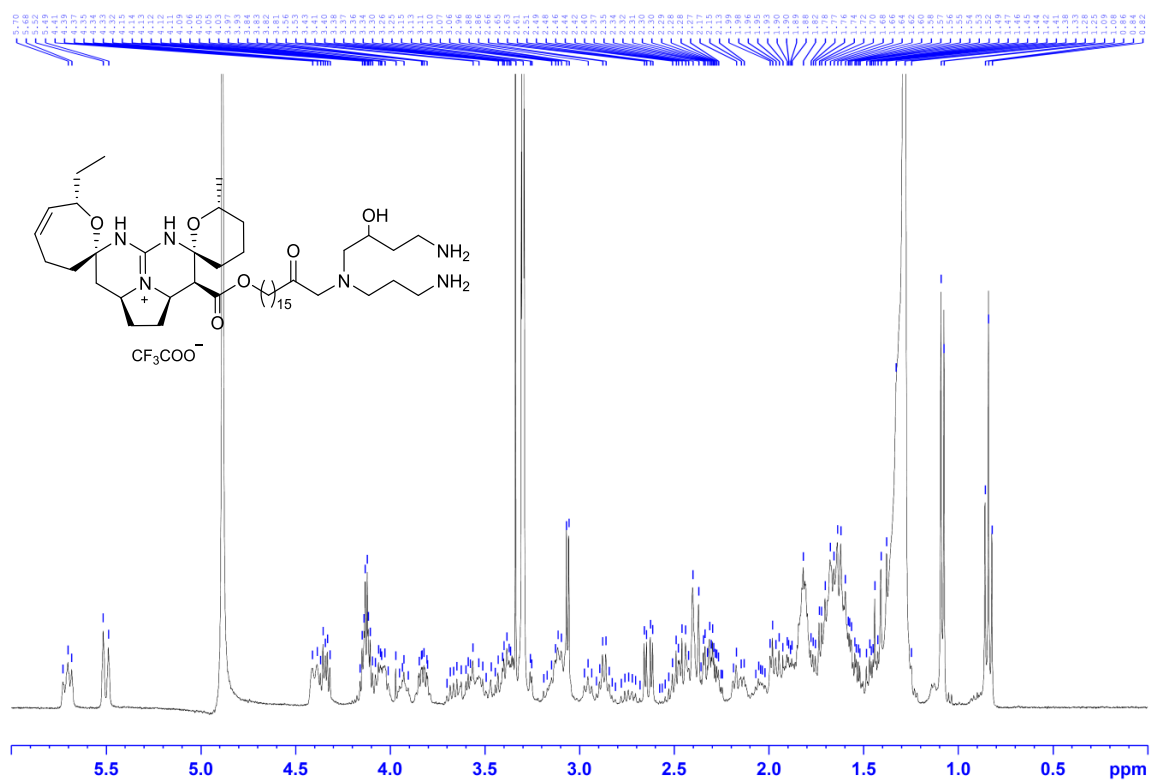Figure S32: <sup>1</sup>H NMR spectrum 6 (400 MHz, CD<sub>3</sub>OD).

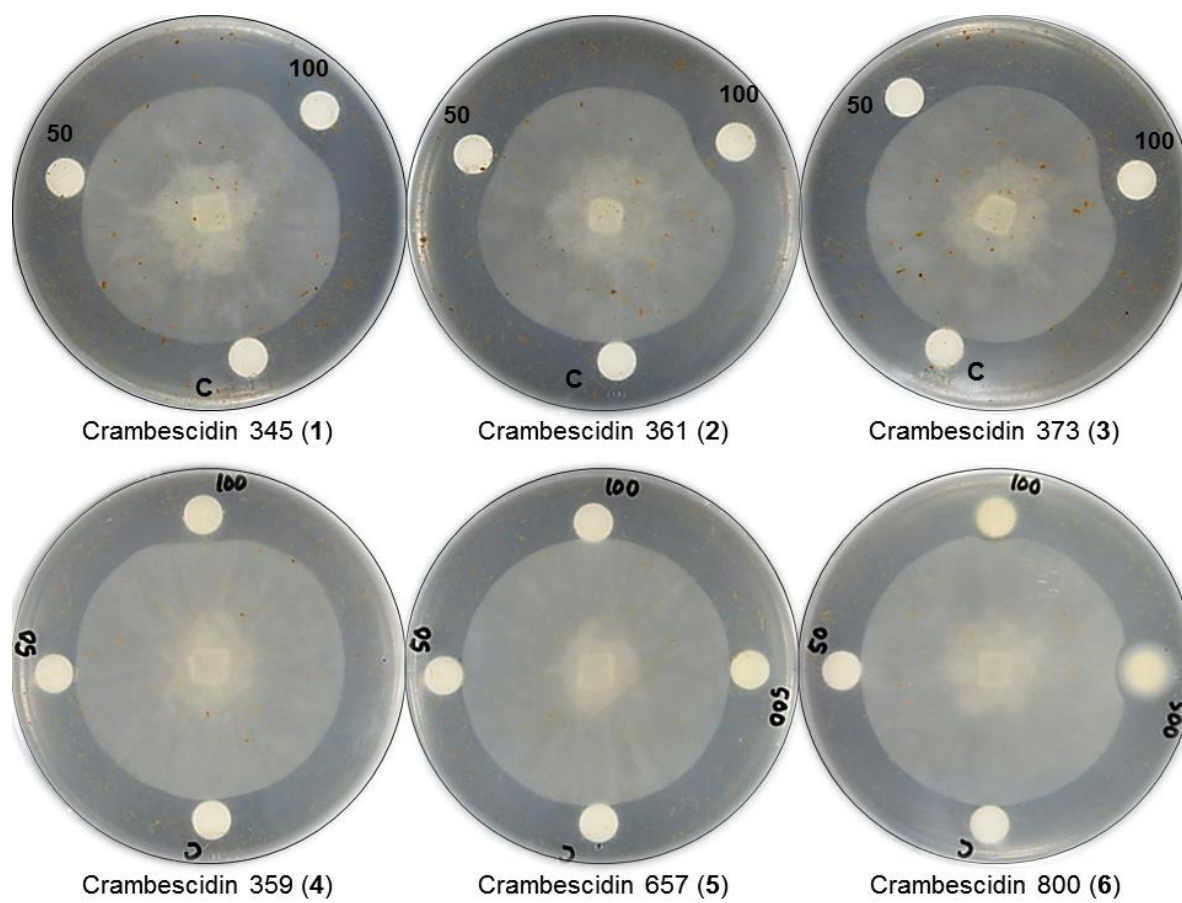

Figure S33: Anti-oomycete activity of 1–6.
